# Supplementary material for: The Role of Cognitive Emotion Regulation for Making and Keeping Friend and Conflict Networks
Source: Frontiers journal article supplement (doi:10.3389/fpsyg.2022.802629), 2022-04-25
Supplement: Data_Sheet_2.PDF [file Data_Sheet_2.PDF]

## Electronic Appendix 1

### Graphic representation and interpretation of the SAOM parameters used in this study

| Model Parameter                                                                                    | Figure                                                                              | Interpretation (Rsiena shortname)                                                                                                         |
|----------------------------------------------------------------------------------------------------|-------------------------------------------------------------------------------------|-------------------------------------------------------------------------------------------------------------------------------------------|
| <b><i>Effects of Covariates of Relationship Selection, Maintenance, and Creation Over Time</i></b> |                                                                                     |                                                                                                                                           |
| Covariate ego / Activity                                                                           |    | Actor $i$ with higher values on a covariate ( $v$ ) extends more outgoing ties {egoX}                                                     |
| Covariate alter /Popularity                                                                        |    | Actor $i$ with higher values on a covariate ( $v$ ) attracts more incoming ties {altX}                                                    |
| Covariate same/ Homophily                                                                          |    | Actor $i$ extends ties to alter $j$ who has exactly the same values on a covariate ( $v$ ), when $v$ is a binary variable {sameX}         |
| Covariate similarity/ Homophily                                                                    |    | Actor $i$ extends ties to alter $j$ who is similar in values on a covariate ( $v$ ), when $v$ is a continuous variable {simX}             |
| <b><i>Network Structural Effects</i></b>                                                           |                                                                                     |                                                                                                                                           |
| Outdegree                                                                                          |  | Actor $i$ extending ties to alter $j$ {density}                                                                                           |
| Reciprocity                                                                                        |  | Actor $i$ reciprocating ties to alter $j$ {recip}                                                                                         |
| Transitive triplets                                                                                |  | Actor $i$ extending ties to alter $j$ to whom he is indirectly tied (via actor $h$ ) {transTrip}                                          |
| Transitive Reciprocated Triplets                                                                   |  | Actor $i$ has a reciprocal tie to alter $j$ to whom he is indirectly tied (via actor $h$ ) {transRecTrip}                                 |
| 3-cycles                                                                                           |  | Actor $i$ extending ties to alter $j$ to whom he is indirectly tied (via actor $h$ ) {cycle3}                                             |
| Transitive Ties                                                                                    |  | Actor $i$ extending ties to alter $j$ to whom he is directly and indirectly tied (via actor $h$ ) (one indirect tie suffices) {transTies} |

Balance

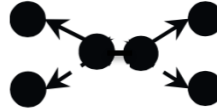

Similarity between the outgoing ties of actor  $i$  and the outgoing ties of the other actors  $j$  to whom  $i$  is tied {balance}

Number of actors at dist 2

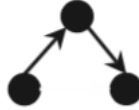

the number of actors to whom actor  $i$  is indirectly tied (through at least one intermediary, i.e., at sociometric distance 2) {nbrDist2}

Indegree – popularity (sqrt)

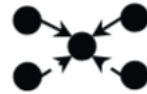

Actors with many incoming ties attract more incoming ties {inPopSqrt}

Outdegree – popularity (sqrt)

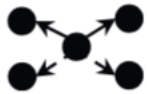

Actors with many outgoing ties extend more outgoing ties {outActSqrt}

### ***Cross-Network Effects***

Conflict to agreement effect in friend network

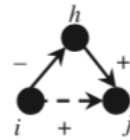

Conflict between  $i$  and  $h$  and friendship between  $h$  and  $j$  lead to friendship between  $i$  and  $j$  {to}

Friend to agreement effect in conflict network

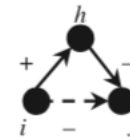

Friendship between  $i$  and  $h$  and conflict between  $h$  and  $j$  lead to conflict between  $i$  and  $j$  {to}
